# Supplementary material for: High-efficiency visible-light-driven oxidation of primary C–H bonds in toluene over a CsPbBr3 perovskite supported by hierarchical TiO2 nanoflakes
Source: Royal Society of Chemistry journal article supplement (doi:10.1039/d3nr03282e), 2023-01-01
Supplement: d3nr03282e1.pdf [file d3nr03282e1.pdf]

## Electronic Supporting Information for

# High-efficiency visible-light-driven oxidation of primary C–H bonds in toluene over CsPbBr<sub>3</sub> perovskite supported by hierarchical TiO<sub>2</sub> nanoflakes

Jiayu Yi,<sup>a</sup> Sunzai Ke,<sup>a</sup> Suwei Lu,<sup>a</sup> Bo Weng,<sup>b</sup> Lijuan Shen,<sup>a</sup> Xuhui Yang,<sup>a</sup> Hun Xue,<sup>a</sup> Min-

Quan Yang<sup>\*a</sup> and Qingrong Qian<sup>\*a</sup>

<sup>a</sup> College of Environmental and Resource Sciences, College of Carbon Neutral Modern Industry, Fujian Key Laboratory of Pollution Control & Resource Reuse, Fujian Normal University, Fuzhou 350117, P. R. China

<sup>b</sup> cMACS, Department of Microbial and Molecular Systems, KU Leuven, Celestijnenlaan 200F, 3001 Leuven, Belgium

*\*To whom correspondence should be addressed*

*E-mail: yangmq@fjnu.edu.cn; qrqian@fjnu.edu.cn*

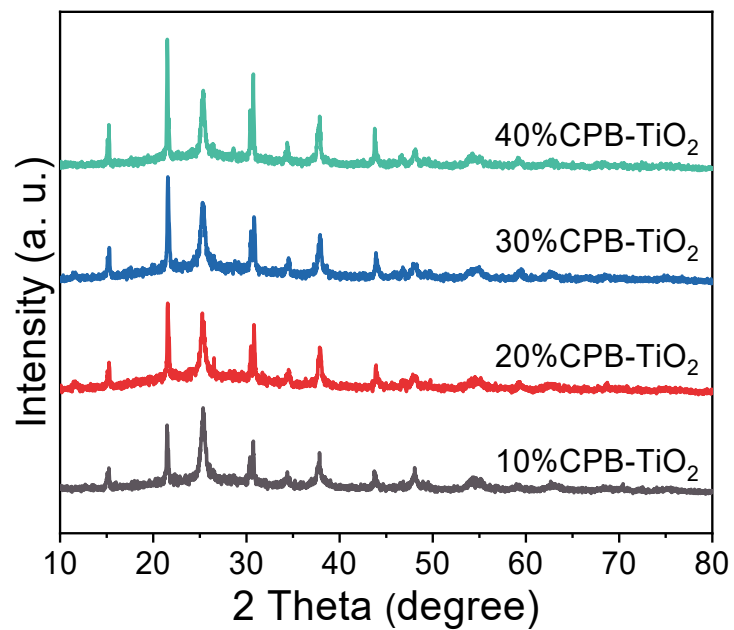

**Figure S1.** XRD patterns of CPB/TiO<sub>2</sub> composites with different weight contents of CsPbBr<sub>3</sub>.

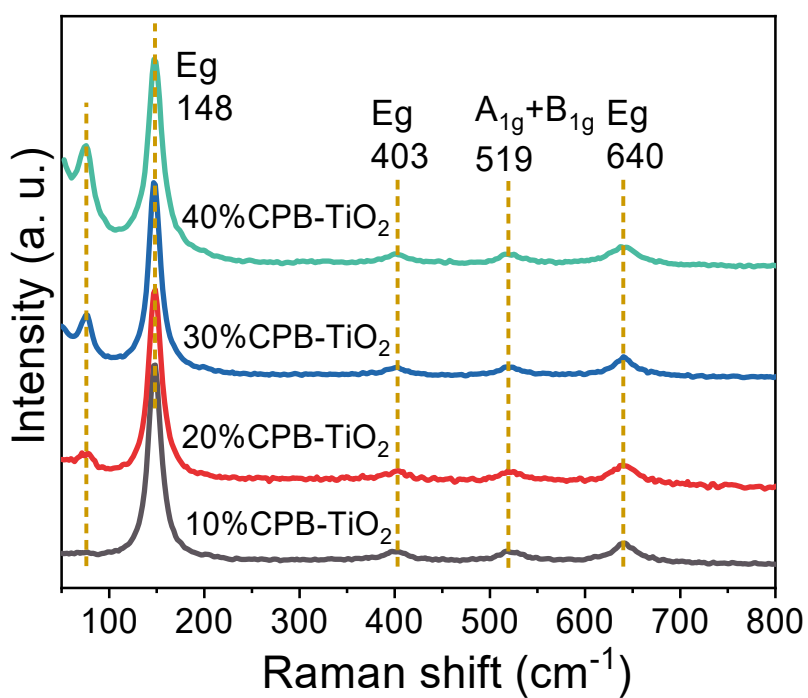

**Figure S2.** Raman spectra of CPB/TiO<sub>2</sub> composites with different weight contents of CsPbBr<sub>3</sub>.

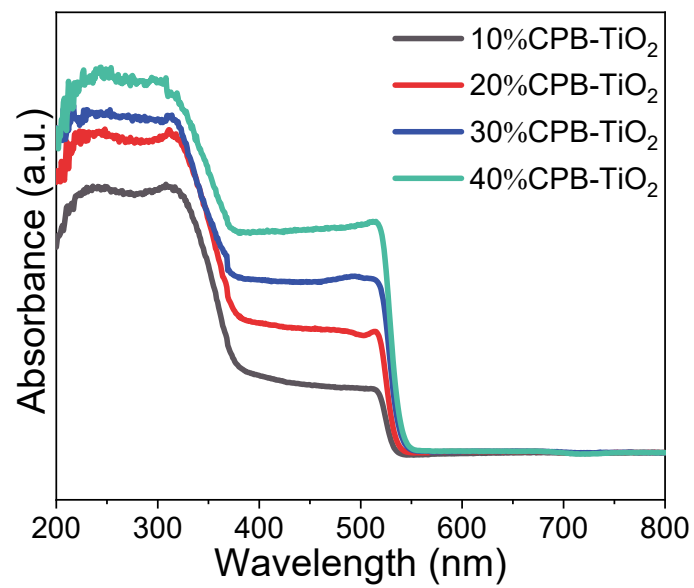

**Figure S3.** UV-vis diffused reflectance spectra of CPB/TiO<sub>2</sub> composites with different weight contents of CsPbBr<sub>3</sub>.

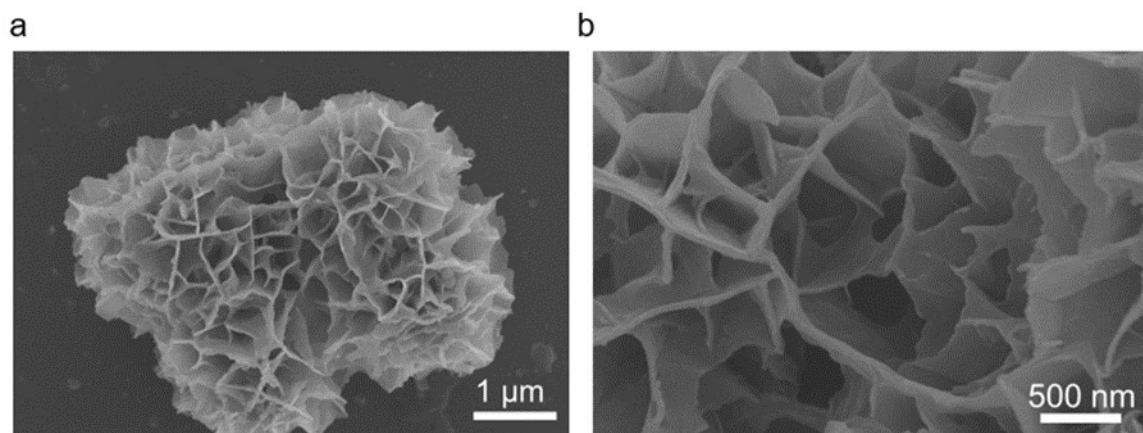

**Figure S4.** SEM images of blank TiO<sub>2</sub>.

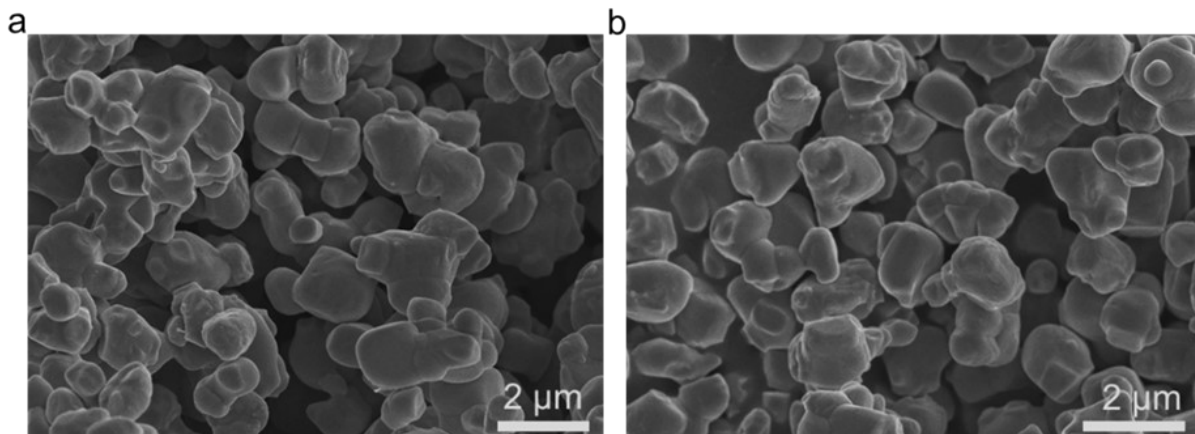

**Figure S5.** SEM images of blank CsPbBr<sub>3</sub>.

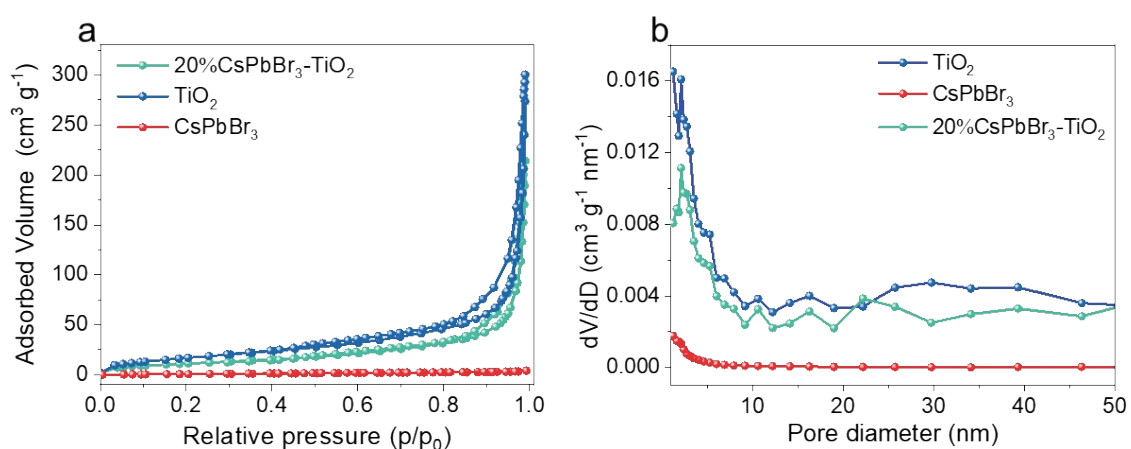

**Figure S6.** N<sub>2</sub> adsorption-desorption isotherms and the corresponding pore size distributions of blank TiO<sub>2</sub>, CsPbBr<sub>3</sub> and 20% CPB/TiO<sub>2</sub> composite.

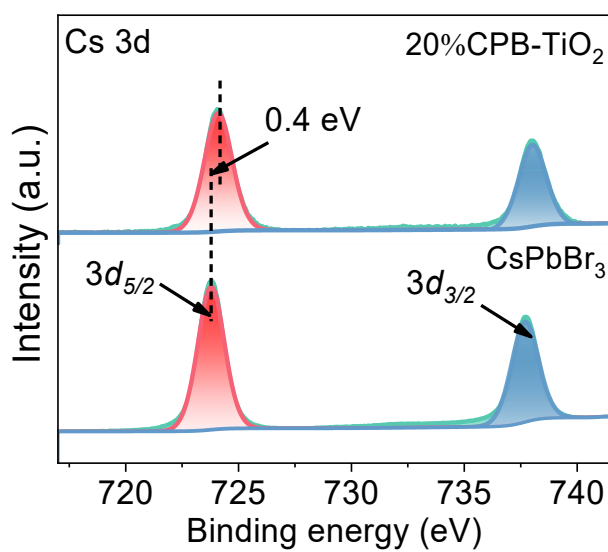

**Figure S7.** Cs 3d XPS spectra of CsPbBr<sub>3</sub> and 20%CPB/TiO<sub>2</sub>.

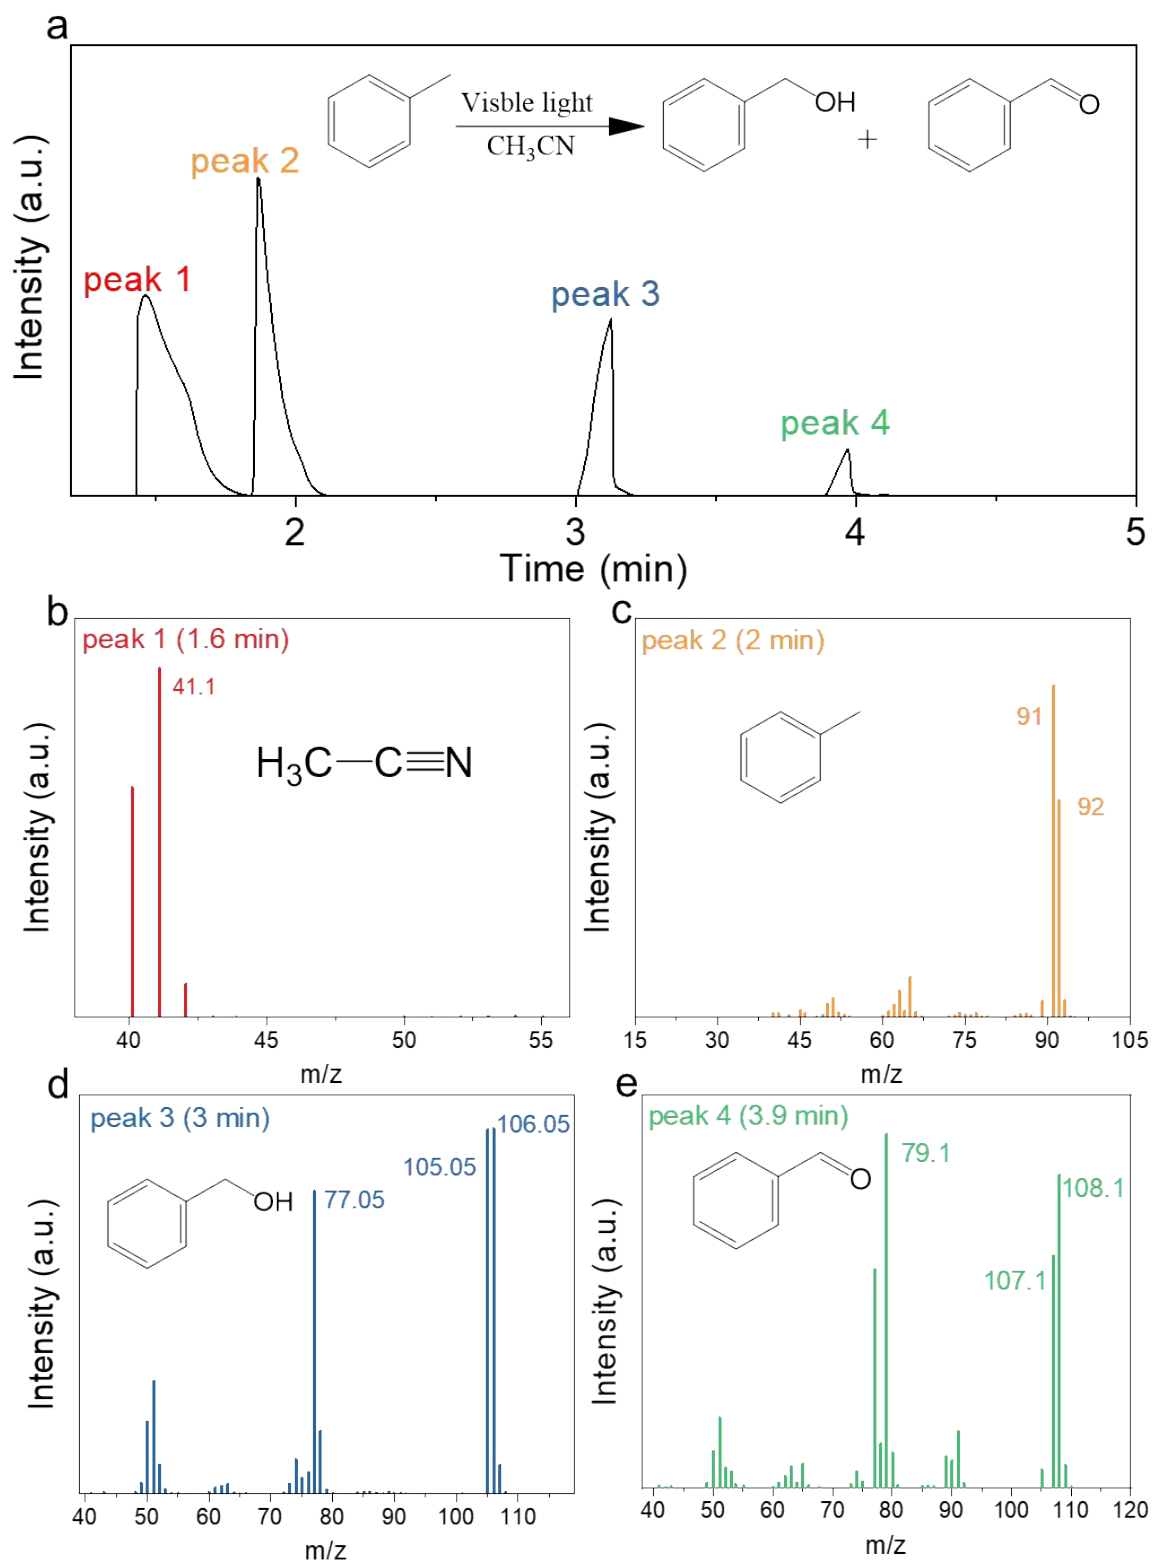

**Figure S8.** GC-MS spectra of the reaction solution after photocatalytic experiment.  
Conditions: 1 ml toluene, 10 mg 20%CPB/TiO<sub>2</sub>, 2 mL CH<sub>3</sub>CN,  $\lambda > 420$  nm.

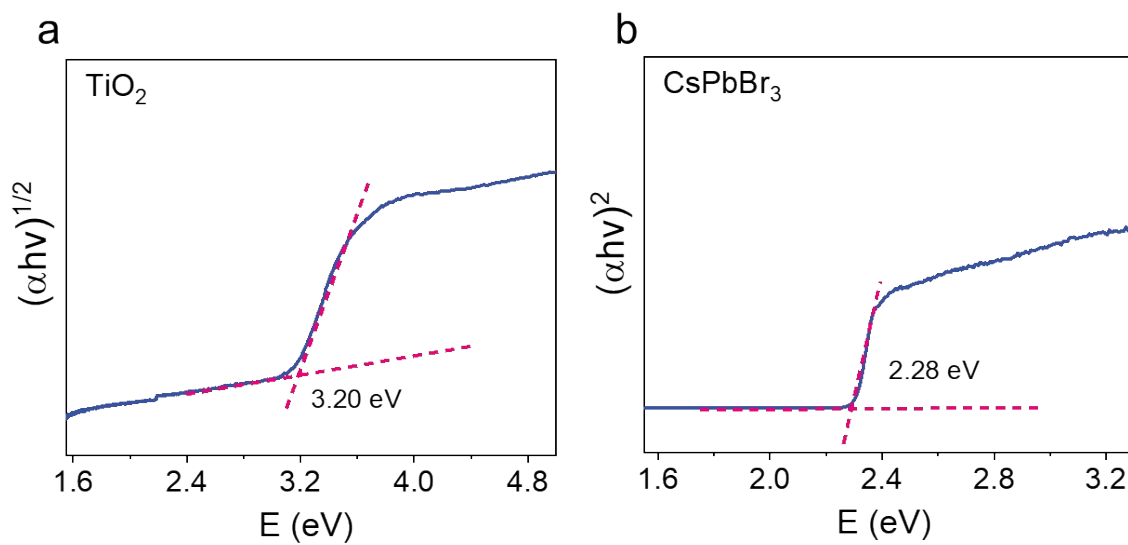

**Figure S9.** Band-gap values of (a) TiO<sub>2</sub> and (b) CsPbBr<sub>3</sub>.

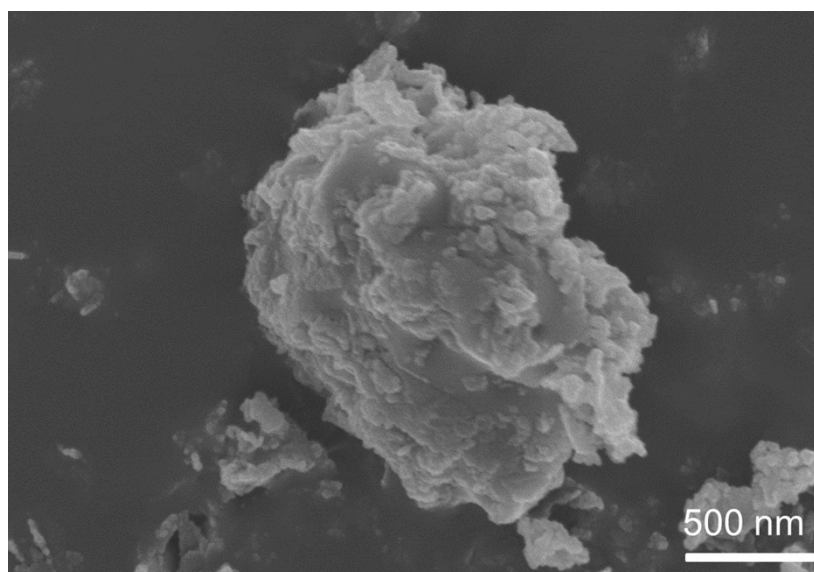

**Figure S10.** SEM image of collapsed TiO<sub>2</sub> without hierarchical structure.

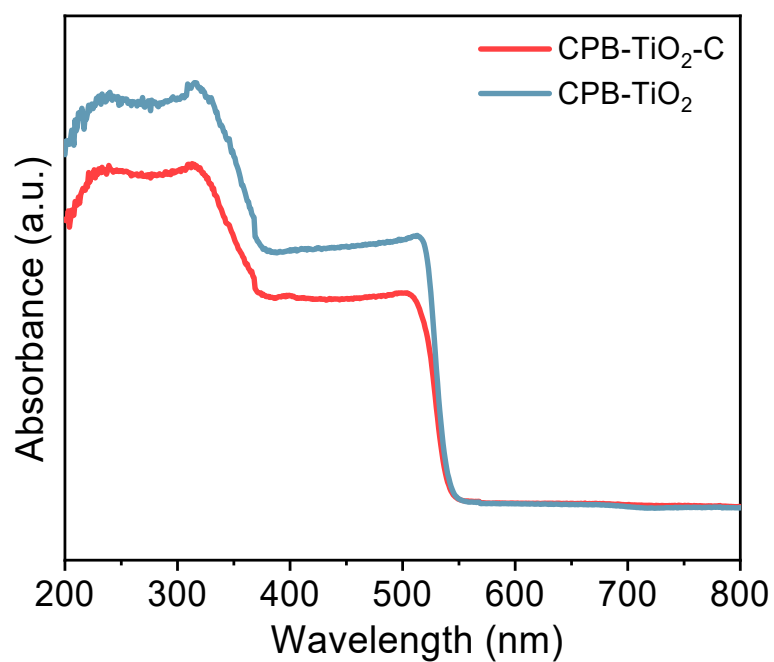

**Figure S11.** UV-vis diffused reflectance spectra of CPB/TiO<sub>2</sub> and CPB/TiO<sub>2</sub>-C.

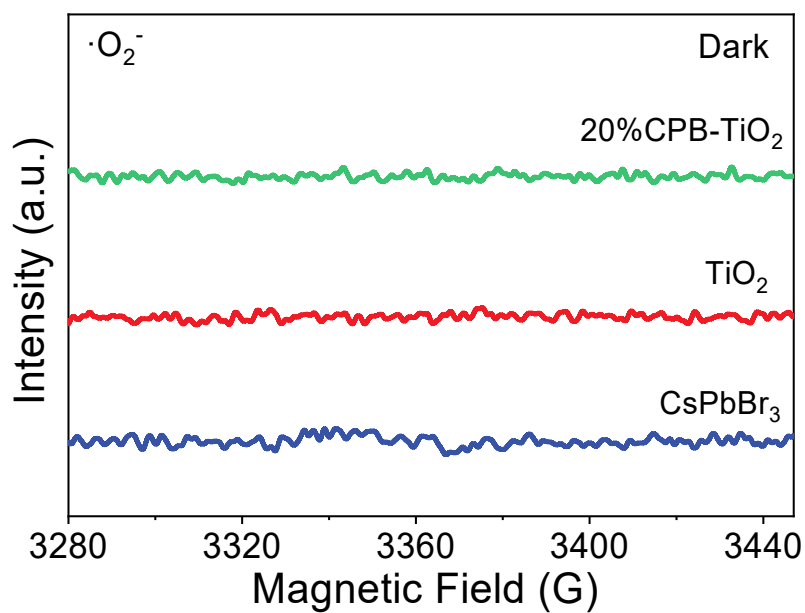

**Figure S12.** EPR spectra of DMPO-•O<sub>2</sub><sup>-</sup> without light.

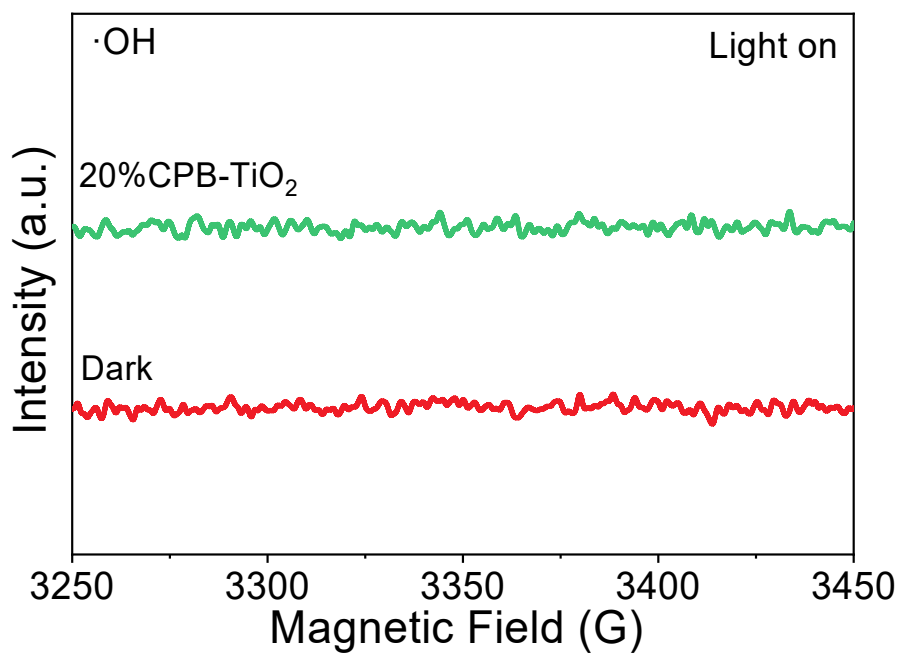

**Figure S13.** EPR spectra of DMPO-•OH for 20%CPB/TiO<sub>2</sub> in the presence of light and without light.

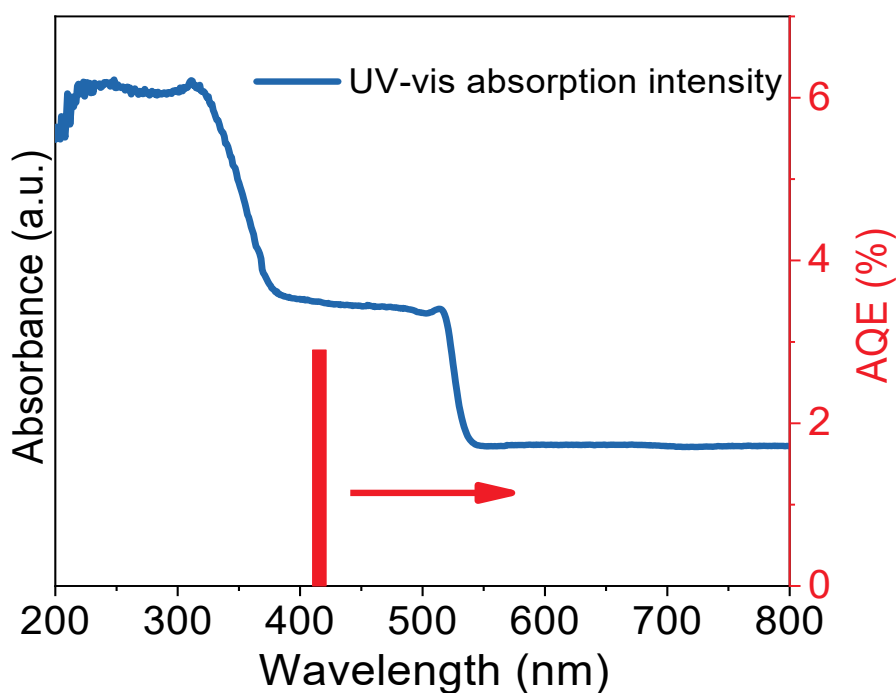

**Figure S14.** The apparent quantum efficiency measured at  $420 \pm 5$  nm of 20%CsPbBr<sub>3</sub>/TiO<sub>2</sub> composite.

**Note:** The number of incident photons ( $N$ ) is calculated by equation 1. The corresponding AQE is calculated to be 2.9% according to equation 2.



$$N = \frac{E\lambda}{hc} = \frac{I \times A \times t \times \lambda}{h \times c} \quad (\text{Equation 1})$$

$$AQE = \frac{\text{Number of transformed toluene}}{\text{Number of incident photos}} = \frac{M \times N_A}{N} \quad (\text{Equation 2})$$

Where  $I$  is the light intensity ( $420.38 \text{ W m}^{-2}$ ),  $A$  is the irradiation area of catalyst solution ( $1.77 \times 10^{-4} \text{ m}^2$ ),  $t$  is light incident time (2 h),  $\lambda$  is the wavenumber of incident light,  $h$  is Planck constant,  $c$  is lightspeed,  $M$  represents the amount of transformed toluene ( $54.4 \text{ } \mu\text{mol}$ ),  $N_A$  represents Avogadro's constant.

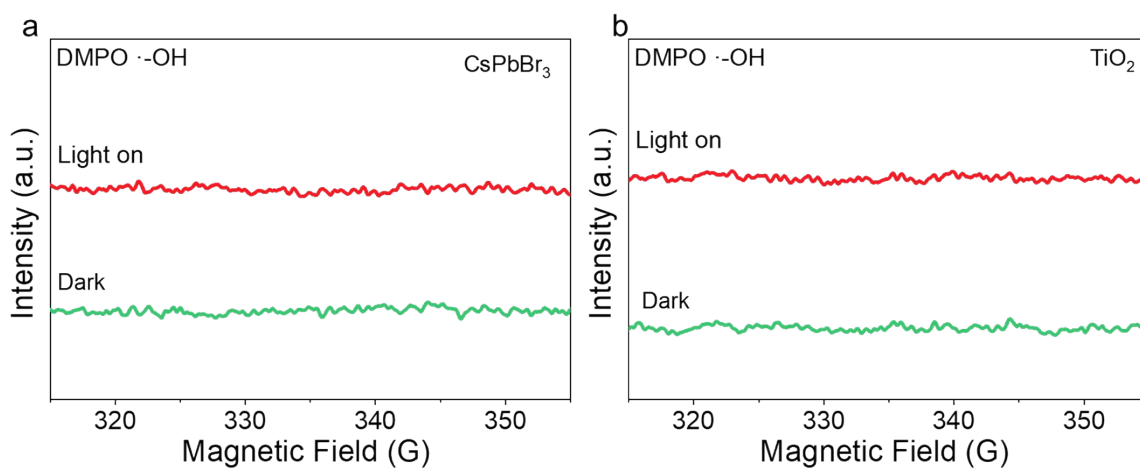

**Figure S15.** EPR spectra of DMPO-•OH for (a) CsPbBr<sub>3</sub> and (b) TiO<sub>2</sub> in the presence of light and without light.

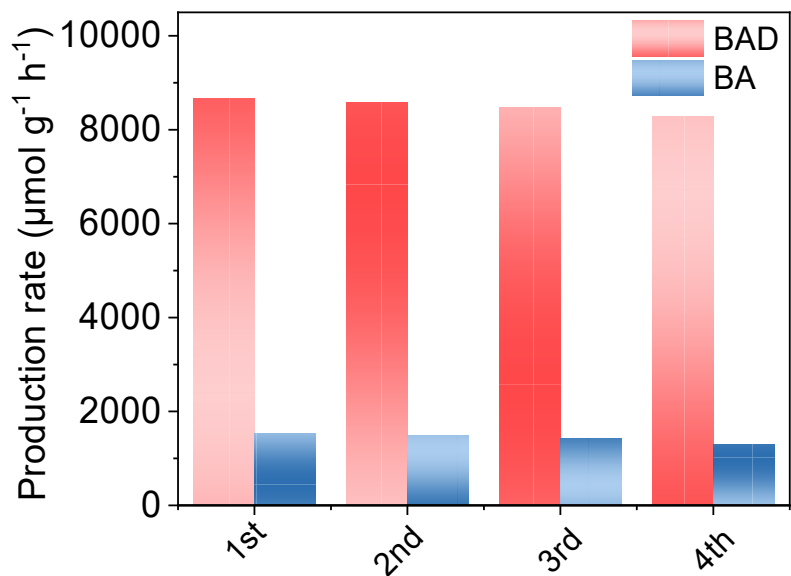

**Figure S16.** Cycle test of the 20%CsPbBr<sub>3</sub>/TiO<sub>2</sub> under visible light.

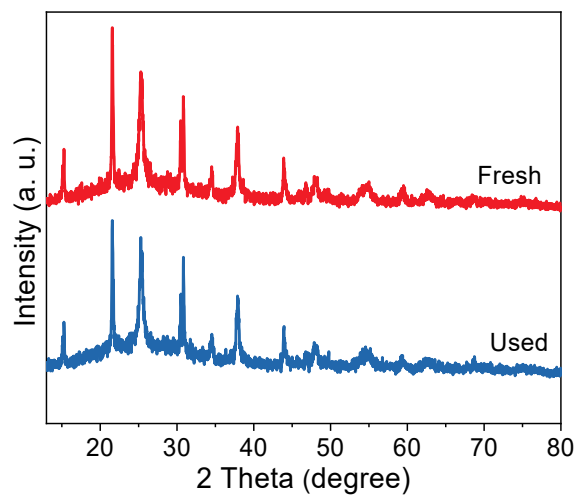

**Figure S17.** XRD patterns of the used and fresh 20%CsPbBr<sub>3</sub>/TiO<sub>2</sub> composite..

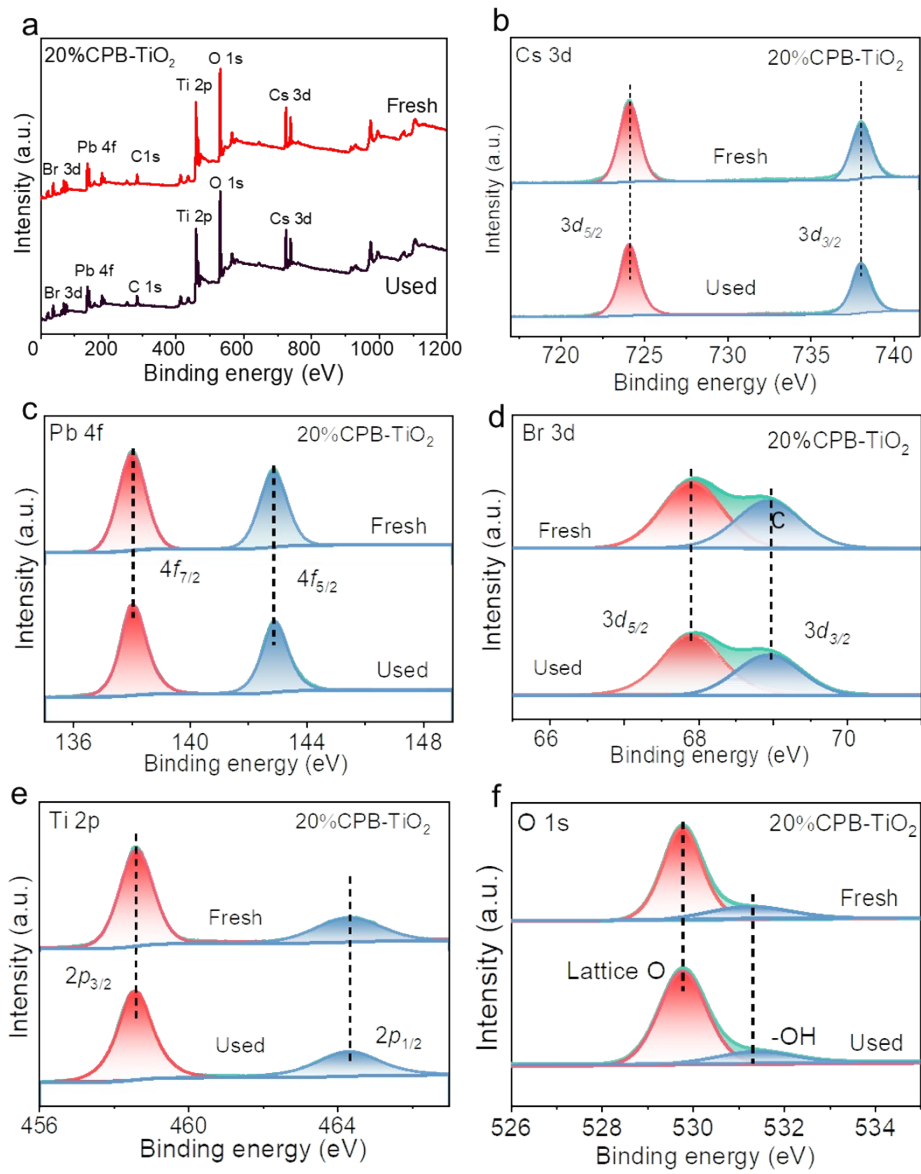

**Figure 18.** XPS analysis for the used and fresh 20%CsPbBr<sub>3</sub>/TiO<sub>2</sub> composite.

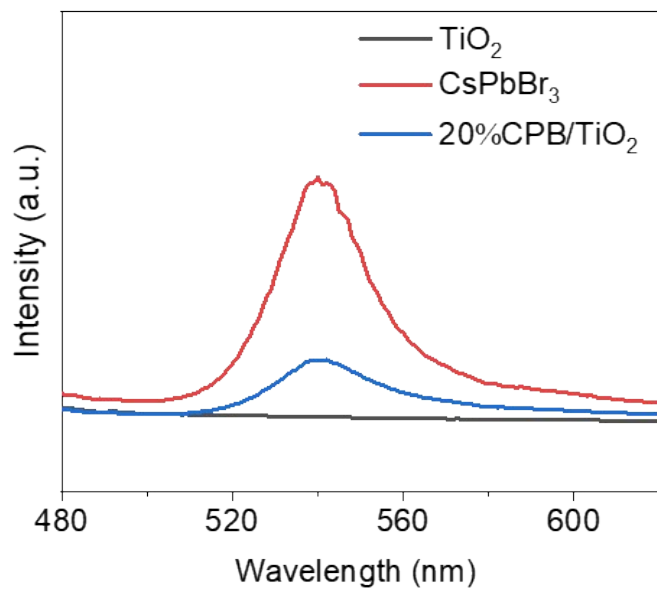

**Figure S19.** The PL spectra of CsPbBr<sub>3</sub>, TiO<sub>2</sub> and 20%CsPbBr<sub>3</sub>/TiO<sub>2</sub>.

**Table S1.** Summary of surface area and pore volume of the TiO<sub>2</sub>, CsPbBr<sub>3</sub> and CPB/TiO<sub>2</sub> composites.

| <b>Samples</b>           | <b>Surface area<br/>(m<sup>2</sup> g<sup>-1</sup>)</b> | <b>Pore volume<br/>(cm<sup>3</sup> g<sup>-1</sup>)</b> |
|--------------------------|--------------------------------------------------------|--------------------------------------------------------|
| TiO <sub>2</sub>         | 66.467                                                 | 0.455                                                  |
| CsPbBr <sub>3</sub>      | 3.196                                                  | 0.006                                                  |
| 20% CPB/TiO <sub>2</sub> | 41.882                                                 | 0.317                                                  |

**Table S2.** Comparison on photocatalytic activity for selective toluene oxidation over the photocatalysts prepared in the present work and reported in the literature.

| Photocatalyst                                                                    | Reaction condition                                                                                        | Rate<br>( $\mu\text{mol}/(\text{g h})$ ) | Ref.      |
|----------------------------------------------------------------------------------|-----------------------------------------------------------------------------------------------------------|------------------------------------------|-----------|
| CsPbBr <sub>3</sub> /TiO <sub>2</sub>                                            | $\lambda \geq 420$ nm, sample (15 mg), toluene (1 mL), O <sub>2</sub> (0.1 MPa), reaction time (5 h)      | 10200                                    | This work |
| TiO <sub>2</sub> /Bi <sub>2</sub> MoO <sub>6</sub>                               | $\lambda \geq 400$ nm, sample (50 mg), toluene (10 mmol), O <sub>2</sub> (3 mL/min), reaction time (3 h)  | 1069                                     | [1]       |
| CdS@C <sub>3</sub> N <sub>4</sub>                                                | $\lambda > 400$ nm, sample (100 mg), toluene (10 mmol), O <sub>2</sub> (3 mL/min), reaction time (3 h)    | 500                                      | [2]       |
| CdS                                                                              | $\lambda > 420$ nm, sample (8 mg), toluene (0.1 mmol), O <sub>2</sub> (0.1 MPa), reaction time (10 h)     | 413                                      | [3]       |
| BiOBr/TiO <sub>2</sub>                                                           | $\lambda > 420$ nm, sample (20 mg), toluene (9.4 mmol), O <sub>2</sub> (0.1 MPa), reaction time (4 h)     | 1169                                     | [4]       |
| Bi <sub>2</sub> WO <sub>6-x</sub> /BiOCl                                         | $\lambda > 400$ nm, sample (50 mg), toluene (10 mmol), O <sub>2</sub> (1 atm), reaction time (2 h)        | 5162                                     | [5]       |
| CdIn <sub>2</sub> S <sub>4</sub> -CdS                                            | $\lambda > 420$ nm, sample (10 mg), toluene (47.2 $\mu\text{mol}$ ), O <sub>2</sub> , reaction time (6 h) | 645                                      | [6]       |
| Fe-Bi <sub>2</sub> WO <sub>6</sub>                                               | $\lambda > 420$ nm, sample (20 mg), toluene (10 mmol), O <sub>2</sub> (1 mL/min), reaction time (5 h)     | 1347                                     | [7]       |
| Cl-BiOBr/TiO <sub>2</sub>                                                        | $\lambda > 420$ nm, sample (20 mg), toluene (1 mL), O <sub>2</sub> , reaction time (4 h)                  | 2121                                     | [4]       |
| Cs <sub>3</sub> Bi <sub>2</sub> Br <sub>9</sub> /g-C <sub>3</sub> N <sub>4</sub> | $\lambda > 400$ nm, sample (10 mg), toluene (5 mL), O <sub>2</sub> (0.1 MPa), reaction time (0.17 h)      | 8347                                     | [8]       |
| Cs <sub>3</sub> Bi <sub>2</sub> Br <sub>9</sub> /P25                             | Full-spectrum, sample (10 mg), toluene (5 ml), O <sub>2</sub> , reaction time (4 h)                       | 10651                                    | [9]       |
| NiO <sub>x</sub> /FAPbBr <sub>3</sub> /TiO <sub>2</sub>                          | AM 1.5 G, sample (10 mg), toluene (2.5 ml), O <sub>2</sub> , reaction time (4 h)                          | 4419                                     | [10]      |
| FAPbBr <sub>3</sub> /TiO <sub>2</sub>                                            | AM 1.5 G, sample (10 mg), toluene (2.5 ml), O <sub>2</sub> , reaction time (4 h)                          | 2859                                     | [10]      |

## Reference

1. L.-N. Song, F. Ding, Y.-K. Yang, D. Ding, L. Chen, C.-T. Au and S.-F. Yin, *ACS Sustain. Chem. Eng.*, 2018, **6**, 17044-17050.
2. P. Chen, F. Liu, H. Ding, S. Chen, L. Chen, Y.-J. Li, C.-T. Au and S.-F. Yin, *Appl. Catal., B*, 2019, **252**, 33-40.
3. Y. Zhang, N. Zhang, Z.-R. Tang and Y.-J. Xu, *Chem. Sci.*, 2012, **3**.
4. R. Yuan, S. Fan, H. Zhou, Z. Ding, S. Lin, Z. Li, Z. Zhang, C. Xu, L. Wu, X. Wang and X. Fu, *Angew. Chem. Int. Ed. Engl.*, 2013, **52**, 1035-1039.
5. X. Cao, Z. Chen, R. Lin, W.-C. Cheong, S. Liu, J. Zhang, Q. Peng, C. Chen, T. Han, X. Tong, Y. Wang, R. Shen, W. Zhu, D. Wang and Y. Li, *Nat. Catal.*, 2018, **1**, 704-710.
6. Y.-X. Tan, Z.-M. Chai, B.-H. Wang, S. Tian, X.-X. Deng, Z.-J. Bai, L. Chen, S. Shen, J.-K. Guo, M.-Q. Cai, C.-T. Au and S.-F. Yin, *ACS Catal.*, 2021, **11**, 2492-2503.
7. X.-X. Deng, S. Tian, Z.-M. Chai, Z.-J. Bai, Y.-X. Tan, L. Chen, J.-K. Guo, S. Shen, M.-Q. Cai, C.-T. Au and S.-F. Yin, *Ind. Eng. Chem. Res.*, 2020, **59**, 13528-13538.
8. Z.-J. Bai, Y. Mao, B.-H. Wang, L. Chen, S. Tian, B. Hu, Y.-J. Li, C.-T. Au and S.-F. Yin, *Nano Res.*, 2023, **16**, 6104-6112.
9. Z. Cui, Q. Zhang, H. Fu, Q. Liu, X. Liu, Y. Wu, P. Gao, Z. Wang, Z. Zheng, H. Cheng, Y. Liu, Y. Dai, B. Huang and P. Wang, *Appl. Catal., B*, 2023, **333**, 122812.
10. H. Huang, H. Yuan, J. Zhao, G. Solís-Fernández, C. Zhou, J. W. Seo, J. Hendrix, E. Debroye, J. A. Steele, J. Hofkens, J. Long and M. B. J. Roelofs, *ACS Energy Lett.*, 2018, **4**, 203-208.
